# Supplementary material for: Subereamolline A as a Potent Breast Cancer Migration, Invasion and Proliferation Inhibitor and Bioactive Dibrominated Alkaloids from the Red Sea Sponge Pseudoceratina arabica
Source: Mar Drugs. 2012 Nov 8;10(11):2492–508. doi: 10.3390/md10112492 (PMC3509531; doi:10.3390/md10112492)

## Supplementary Information

|                    |                                                                               |   |
|--------------------|-------------------------------------------------------------------------------|---|
| <b>Figure S1.</b>  | $^1\text{H}$ NMR spectrum of compound <b>1</b> ( $\text{CD}_3\text{OD}$ ).    | 2 |
| <b>Figure S2.</b>  | $^{13}\text{C}$ NMR spectrum of compound <b>1</b> ( $\text{CD}_3\text{OD}$ ). | 2 |
| <b>Figure S3.</b>  | $^1\text{H}$ NMR spectrum of compound <b>2</b> ( $\text{CD}_3\text{OD}$ ).    | 3 |
| <b>Figure S4.</b>  | $^{13}\text{C}$ NMR spectrum of compound <b>2</b> ( $\text{CD}_3\text{OD}$ ). | 3 |
| <b>Figure S5.</b>  | $^1\text{H}$ NMR spectrum of compound <b>3</b> ( $\text{CD}_3\text{OD}$ ).    | 4 |
| <b>Figure S6.</b>  | $^1\text{H}$ NMR spectrum of compound <b>3</b> ( $\text{DMSO}-d_6$ ).         | 4 |
| <b>Figure S7.</b>  | $^{13}\text{C}$ NMR spectrum of compound <b>3</b> ( $\text{CD}_3\text{OD}$ ). | 4 |
| <b>Figure S8.</b>  | COSY spectrum of compound <b>3</b> ( $\text{CD}_3\text{OD}$ ).                | 5 |
| <b>Figure S9.</b>  | HSQC spectrum of compound <b>3</b> ( $\text{CD}_3\text{OD}$ ).                | 5 |
| <b>Figure S10.</b> | HMBC Spectrum of compound <b>3</b> ( $\text{CD}_3\text{OD}$ ).                | 6 |
| <b>Figure S11.</b> | NOESY Spectrum of compound <b>3</b> ( $\text{CD}_3\text{OD}$ ).               | 6 |
| <b>Figure S12.</b> | $^1\text{H}$ NMR spectrum of compound <b>4</b> ( $\text{CD}_3\text{OD}$ ).    | 7 |
| <b>Figure S13.</b> | $^{13}\text{C}$ NMR spectrum of compound <b>4</b> ( $\text{CD}_3\text{OD}$ ). | 7 |
| <b>Figure S14.</b> | $^1\text{H}$ NMR spectrum of compound <b>5</b> ( $\text{CD}_3\text{OD}$ ).    | 8 |
| <b>Figure S15.</b> | $^{13}\text{C}$ NMR spectrum of compound <b>5</b> ( $\text{CD}_3\text{OD}$ ). | 8 |
| <b>Figure S16.</b> | $^1\text{H}$ NMR spectrum of compound <b>6</b> ( $\text{CD}_3\text{OD}$ ).    | 9 |
| <b>Figure S17.</b> | $^{13}\text{C}$ NMR spectrum of compound <b>6</b> ( $\text{CD}_3\text{OD}$ ). | 9 |

**Figure S1.**  $^1\text{H}$  NMR spectrum of compound **1** ( $\text{CD}_3\text{OD}$ ).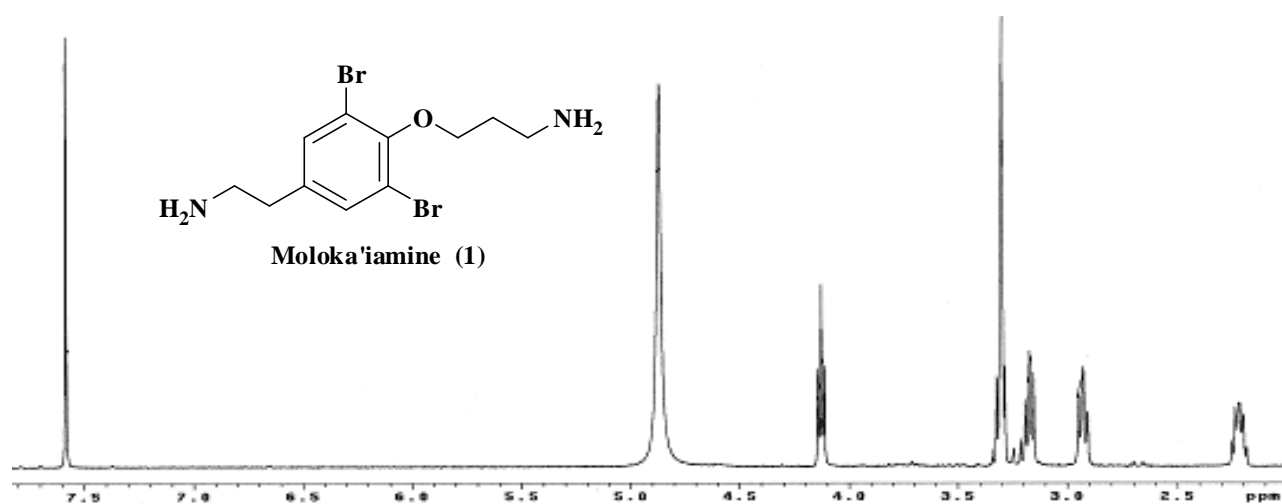**Figure S2.**  $^{13}\text{C}$  NMR spectrum of compound **1** ( $\text{CD}_3\text{OD}$ ).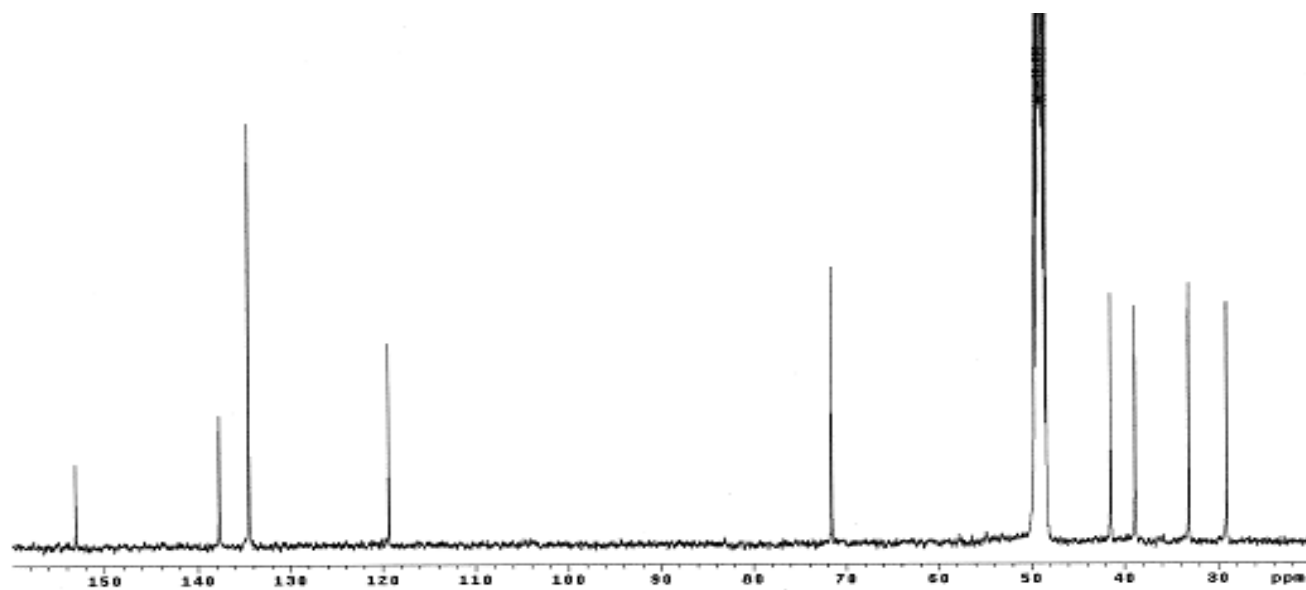

**Figure S3.**  $^1\text{H}$  NMR spectrum of compound **2** ( $\text{CD}_3\text{OD}$ ).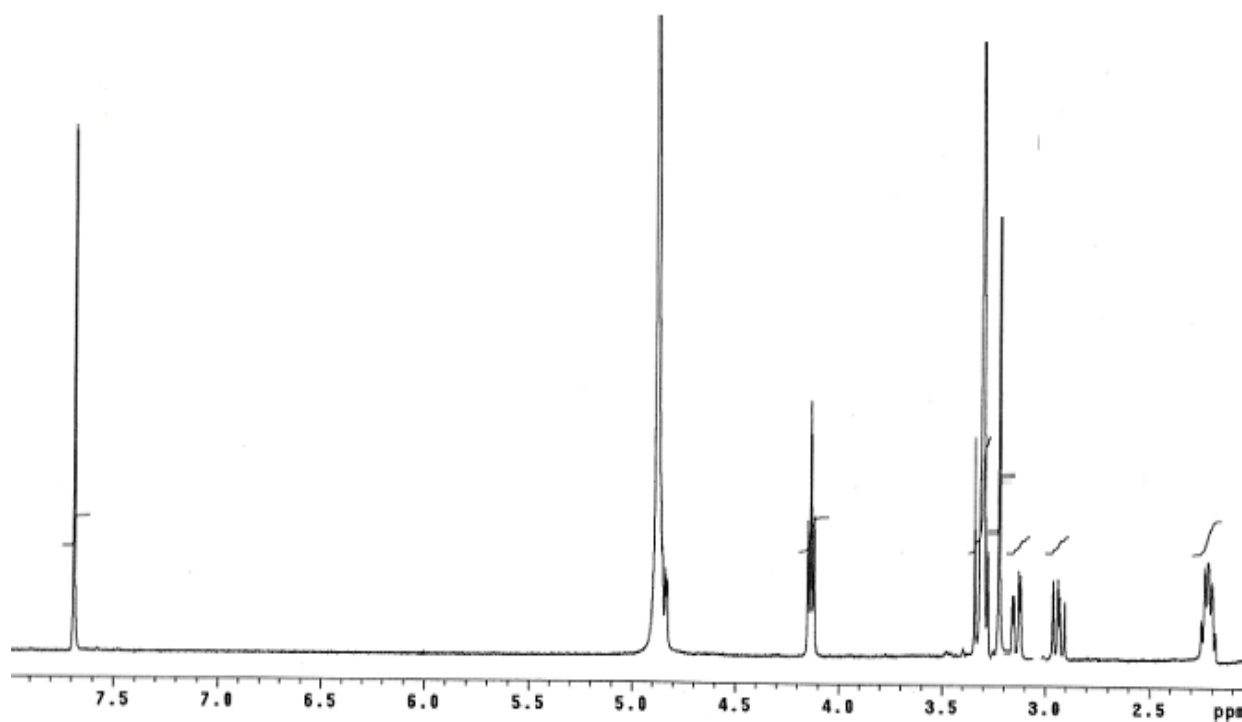**Figure S4.**  $^{13}\text{C}$  NMR spectrum of compound **2** ( $\text{CD}_3\text{OD}$ ).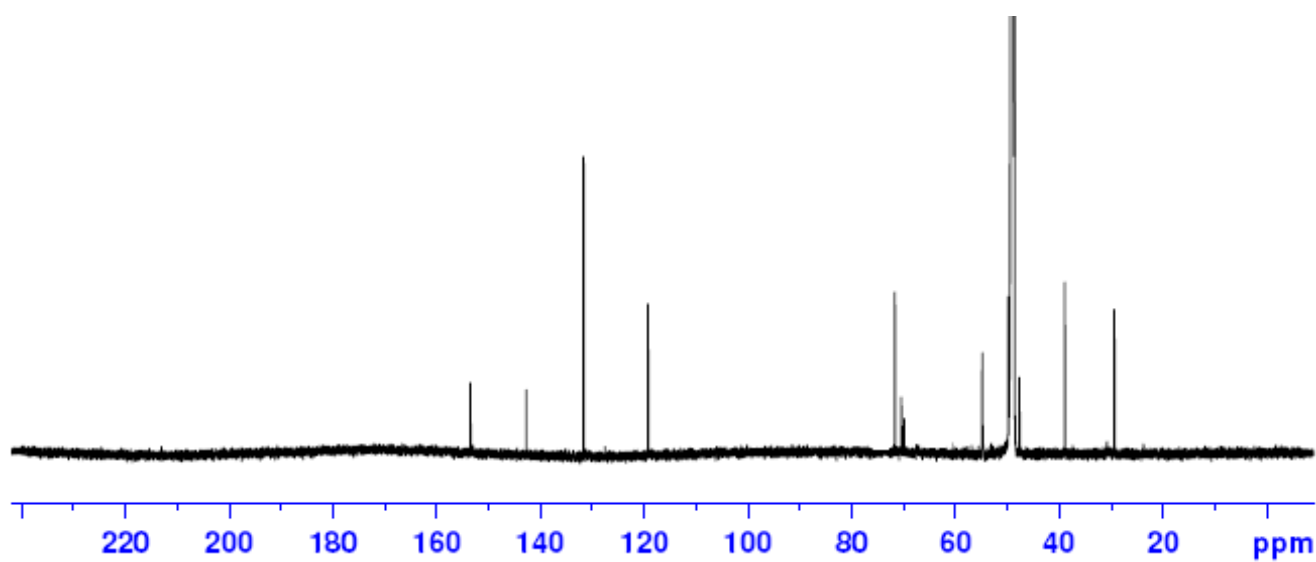

**Figure S5.**  $^1\text{H}$  NMR spectrum of compound **3** ( $\text{CD}_3\text{OD}$ ).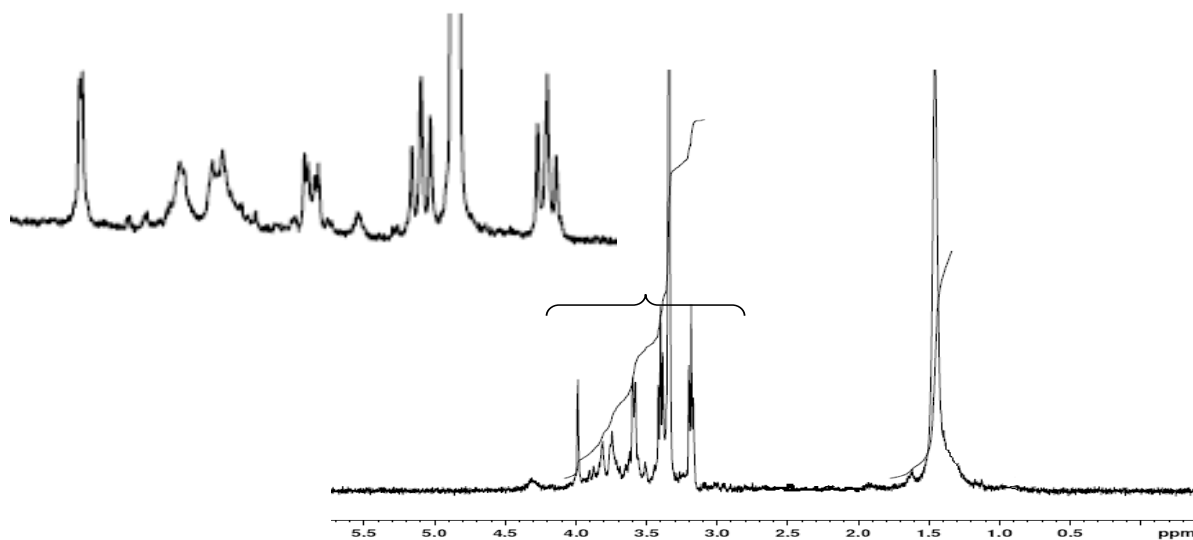**Figure S6.**  $^1\text{H}$  NMR spectrum of compound **3** ( $\text{DMSO}-d_6$ ).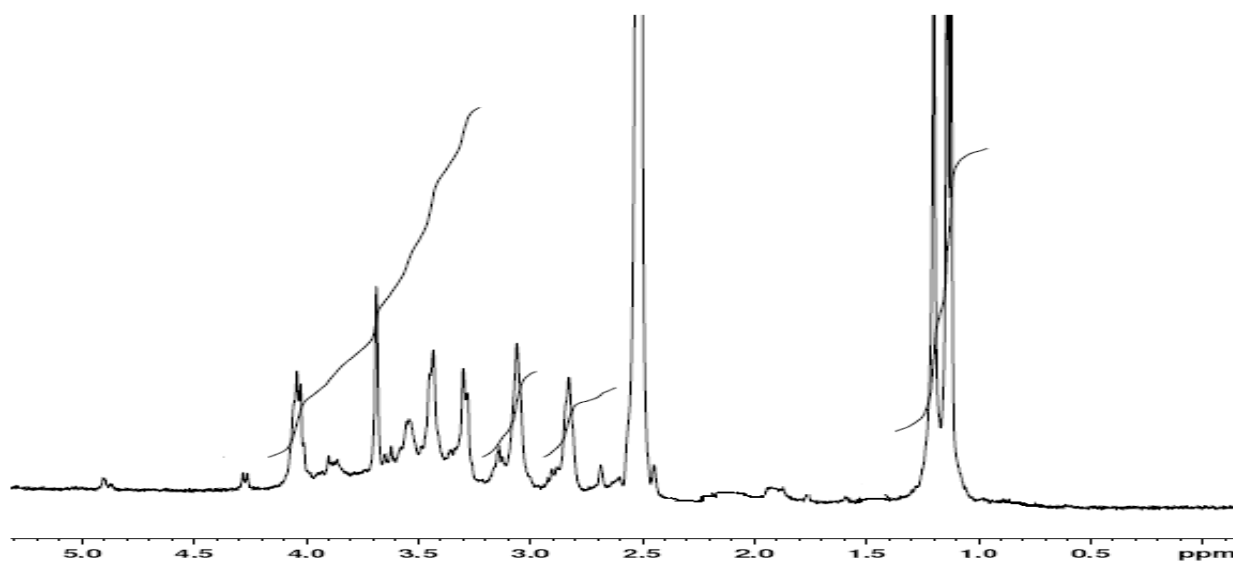**Figure S7.**  $^{13}\text{C}$  NMR spectrum of compound **3** ( $\text{CD}_3\text{OD}$ ).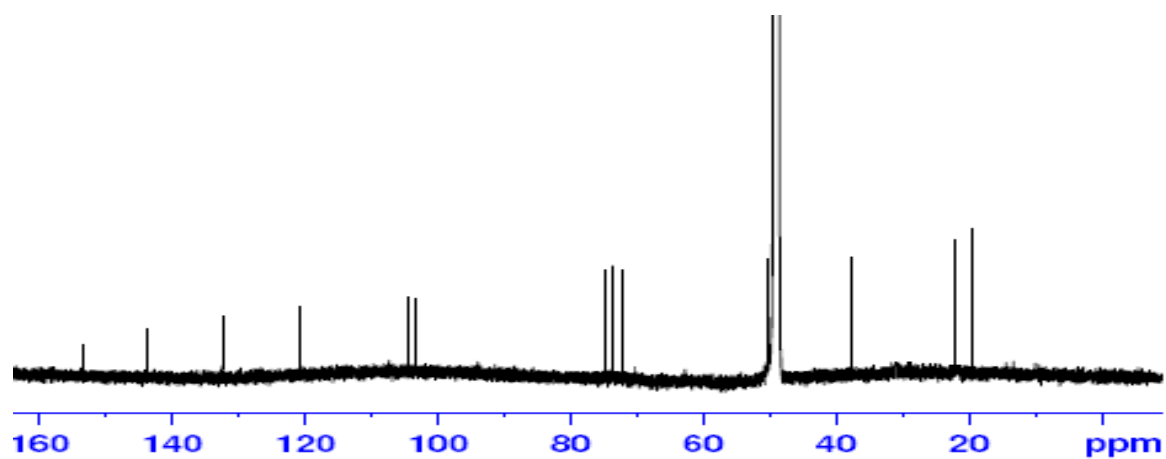

**Figure S8.** COSY spectrum of compound **3** (CD<sub>3</sub>OD).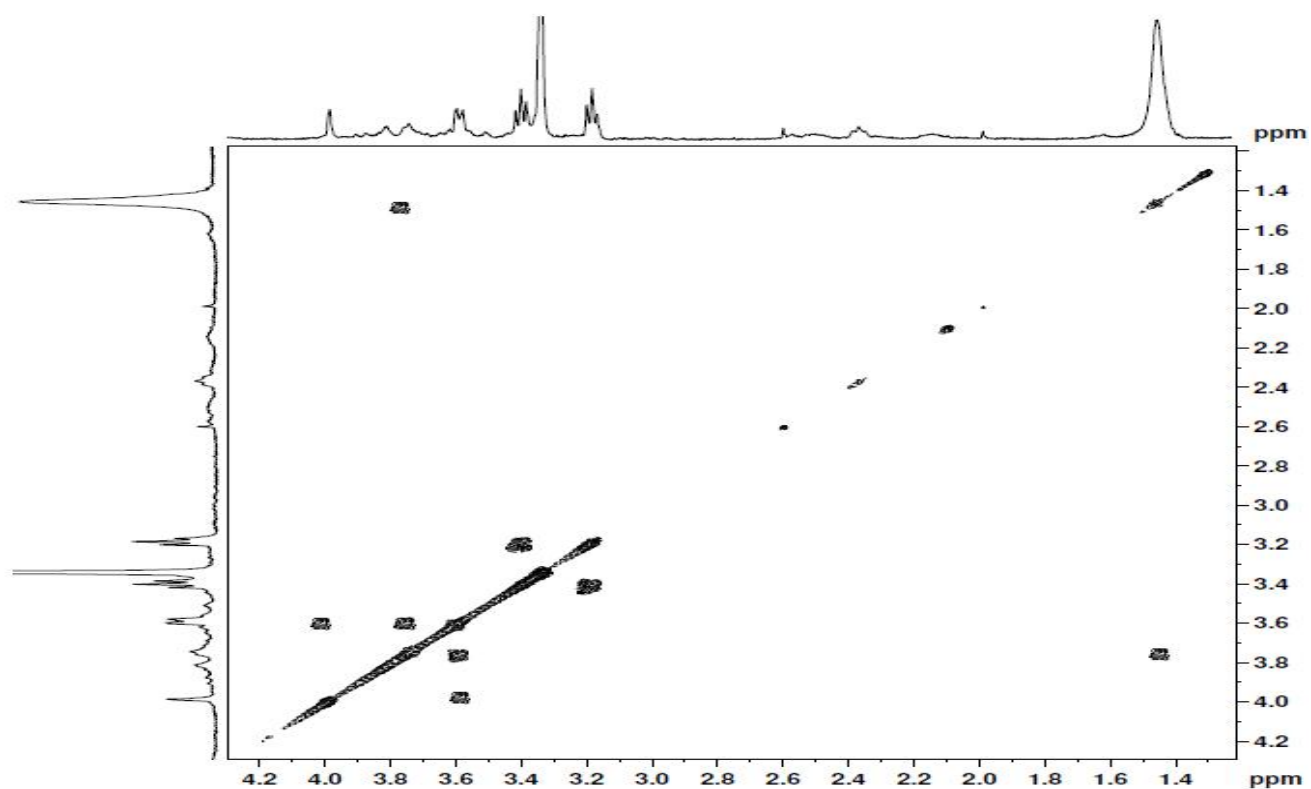**Figure S9.** HSQC spectrum of compound **3** (CD<sub>3</sub>OD).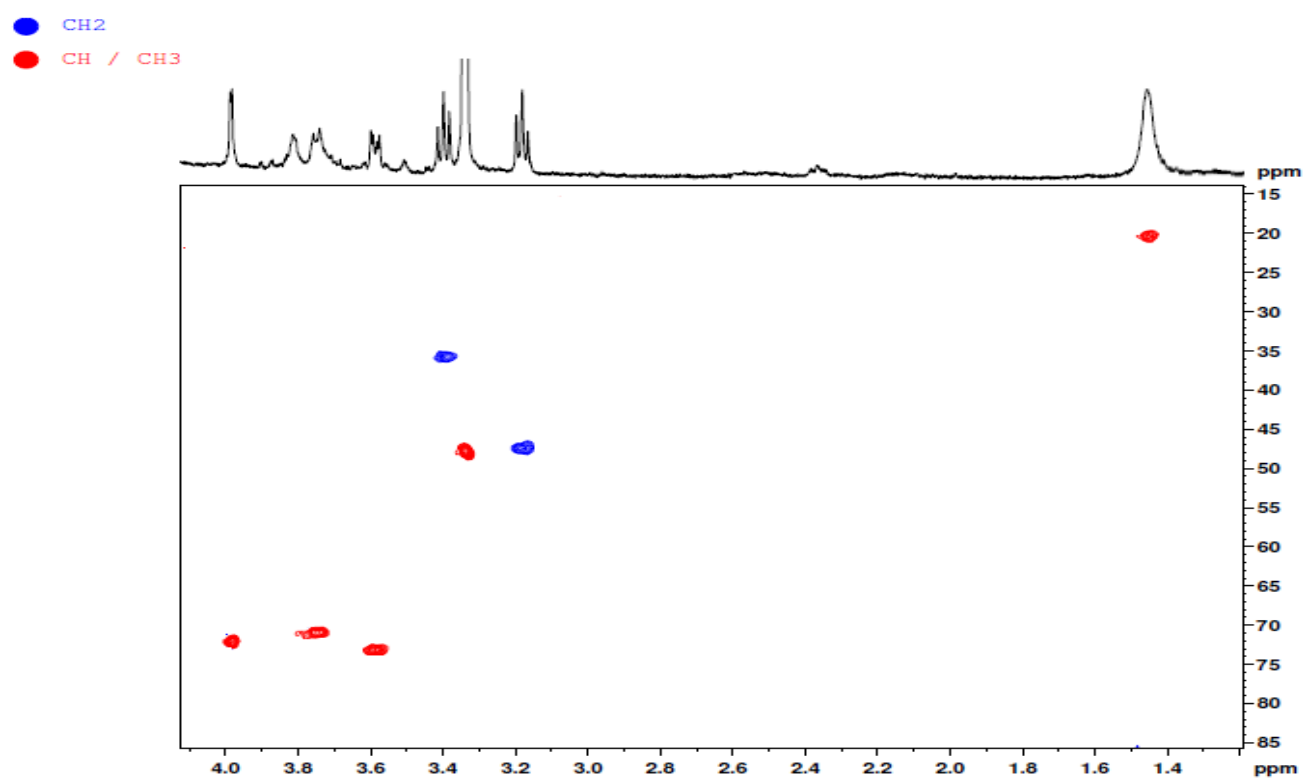

**Figure S10.** HMBC Spectrum of compound **3** (CD<sub>3</sub>OD).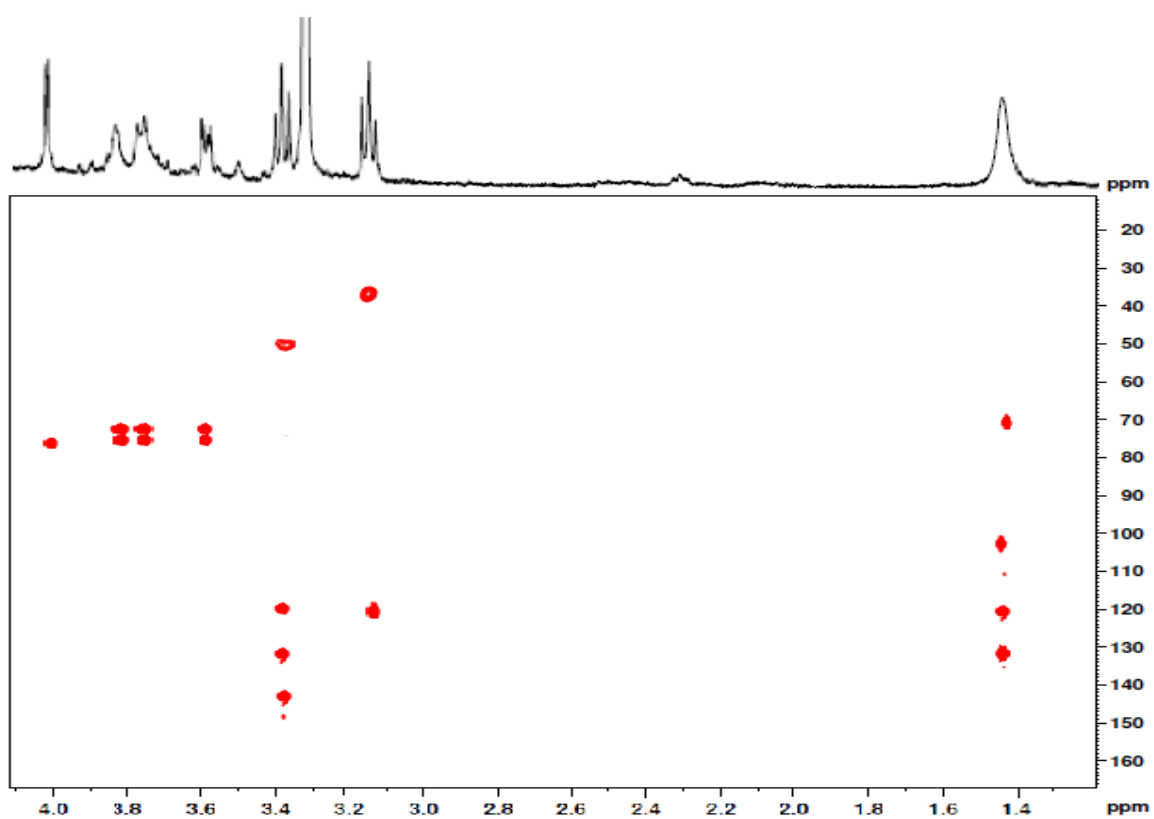**Figure S11.** NOESY Spectrum of compound **3** (CD<sub>3</sub>OD).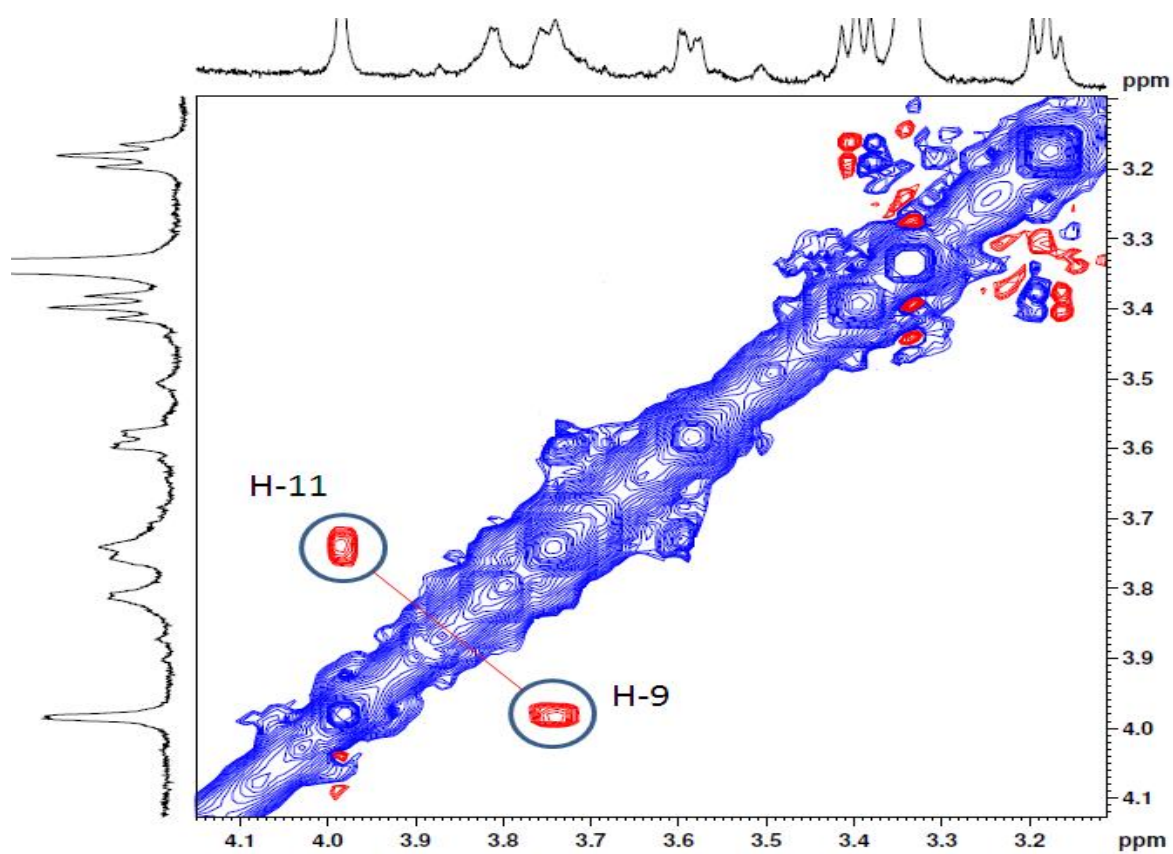

**Figure S12.**  $^1\text{H}$  NMR spectrum of compound **4** ( $\text{CD}_3\text{OD}$ ).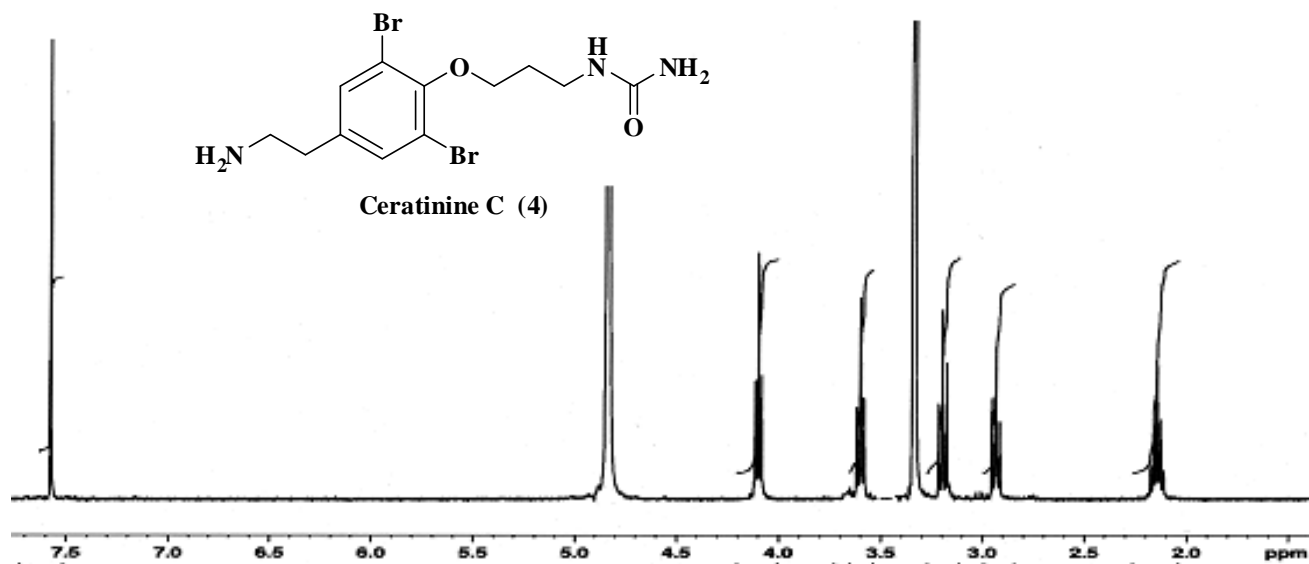**Figure S13.**  $^{13}\text{C}$  NMR spectrum of compound **4** ( $\text{CD}_3\text{OD}$ ).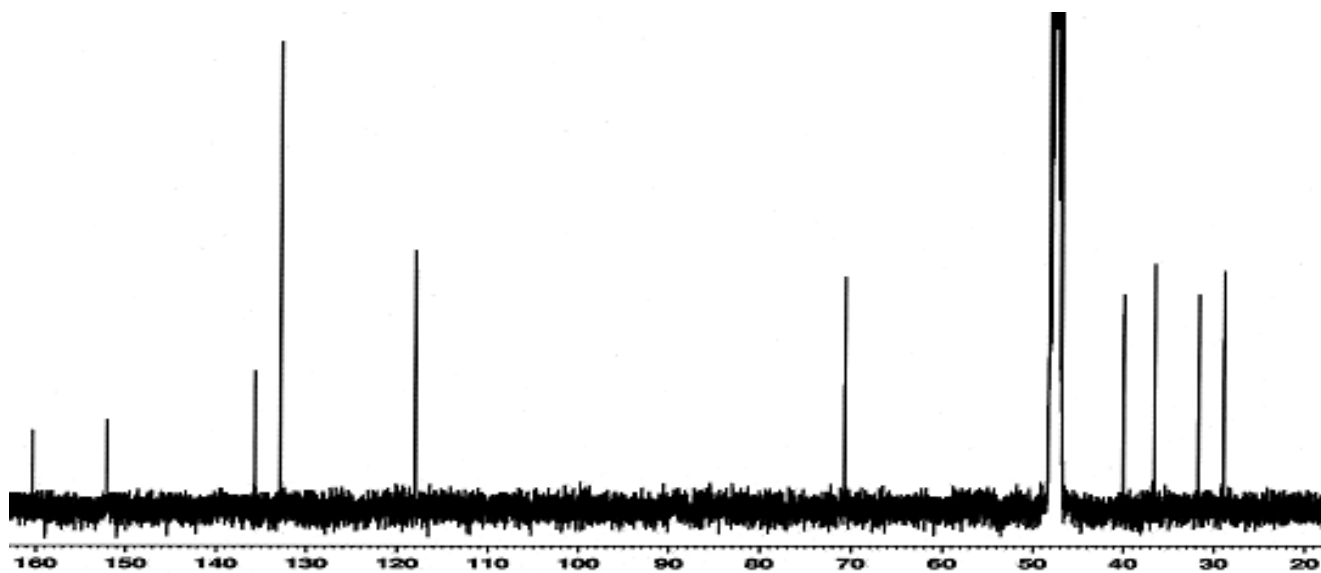

**Figure S14.**  $^1\text{H}$  NMR spectrum of compound **5** ( $\text{CD}_3\text{OD}$ ).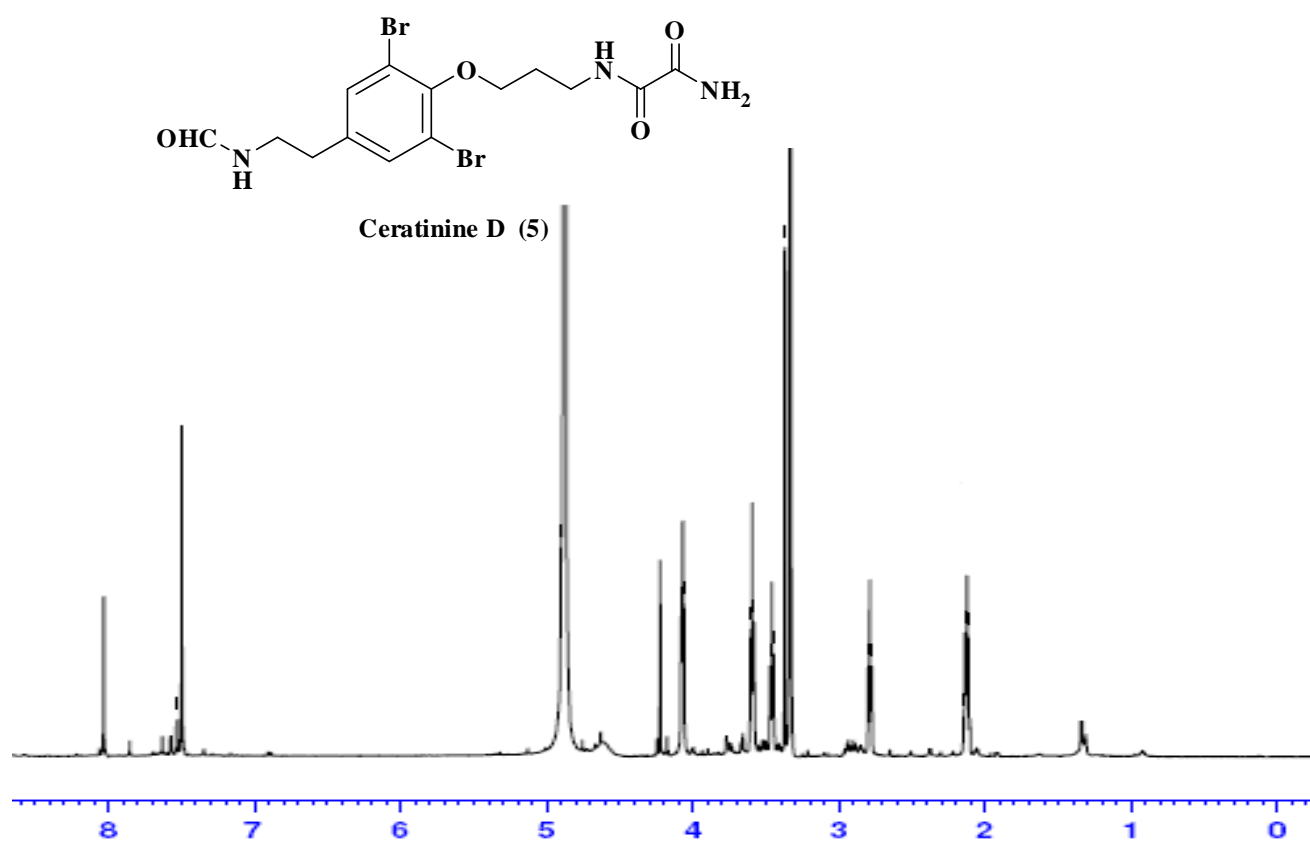**Figure S15.**  $^{13}\text{C}$  NMR spectrum of compound **5** ( $\text{CD}_3\text{OD}$ ).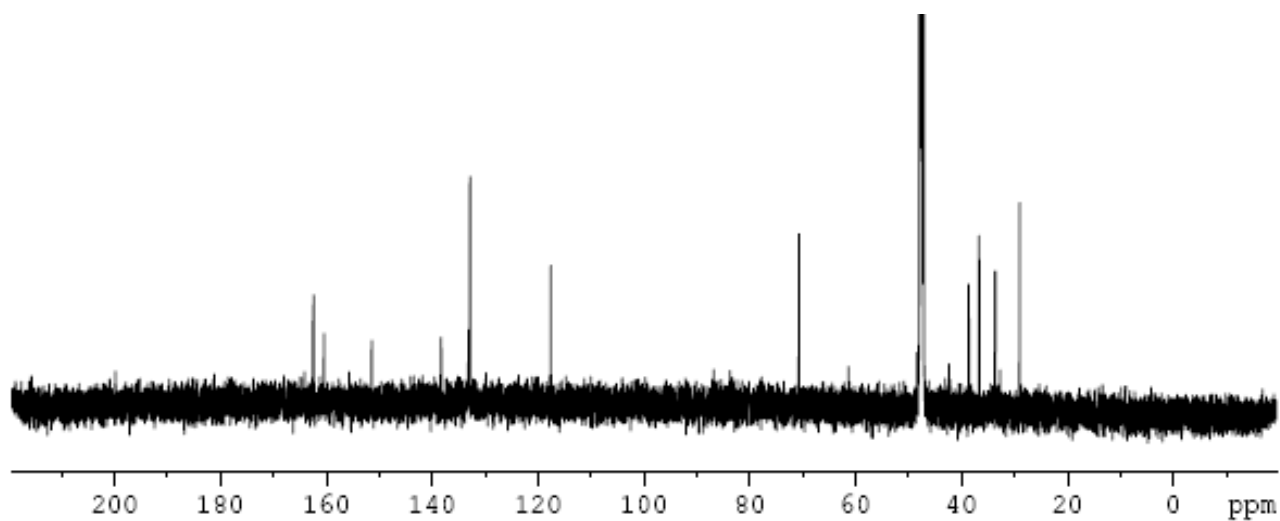

**Figure S16.**  $^1\text{H}$  NMR spectrum of compound **6** ( $\text{CD}_3\text{OD}$ ).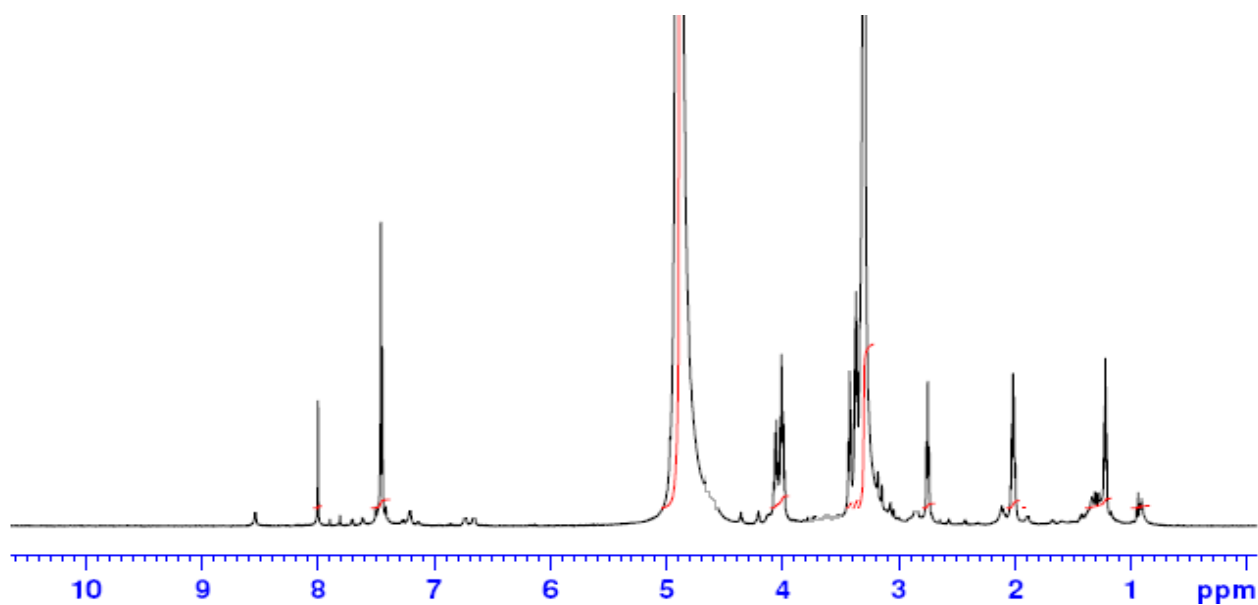**Figure S17.**  $^{13}\text{C}$  NMR spectrum of compound **6** ( $\text{CD}_3\text{OD}$ ).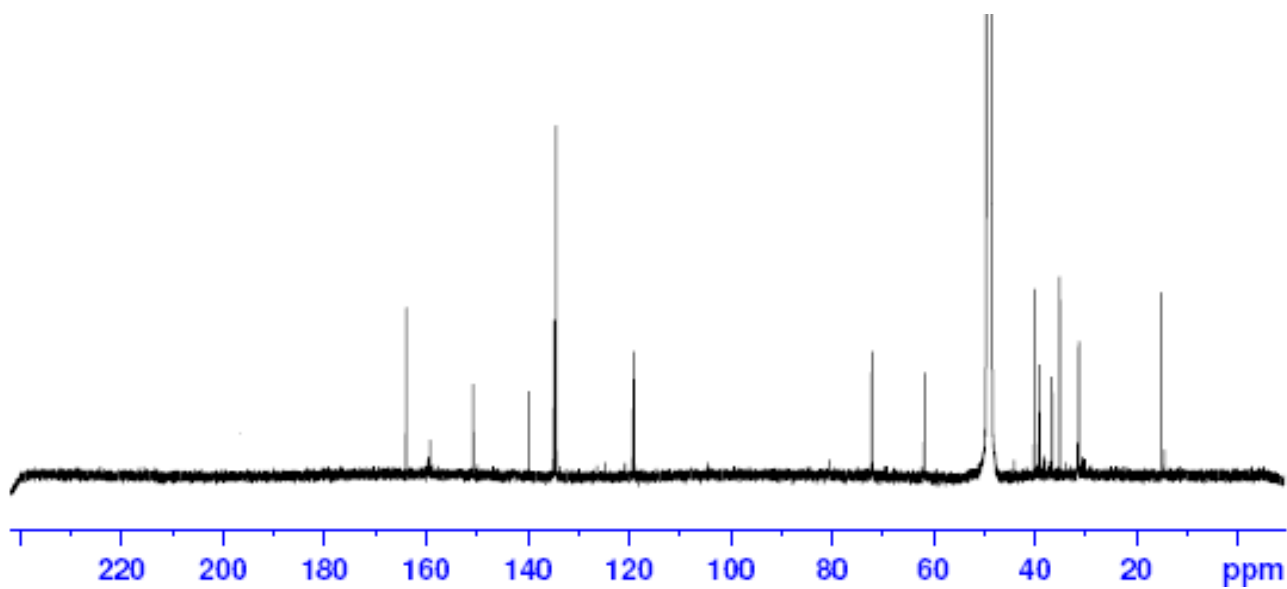

Supplement: Supplementary File 1: — PDF-Document (PDF, 438 KB) [file marinedrugs-10-02492-s001.pdf]
